# Supplementary material for: Novel H2S sensing mechanism derived from the formation of oligomeric sulfide capping the surface of gold nanourchins
Source: Royal Society of Chemistry journal article supplement (doi:10.1039/d3ra05527b), 2023-01-01
Supplement: d3ra05527b1.pdf [file d3ra05527b1.pdf]

## Supplementary Information

### Novel H<sub>2</sub>S sensing mechanism derived from the formation of oligomeric sulfide capping the surface of gold nanourchins

Hana Park <sup>a</sup>, Su-Jin Yoon <sup>ac</sup>, Yun-Sik Nam <sup>b</sup>, Ji Yeong Lee <sup>b</sup>,

Yeonhee Lee <sup>b</sup>, Jin Young Kim <sup>ac</sup>, Kang-Bong Lee <sup>\*ac</sup>

<sup>a</sup> *Climate and Environmental Research Institute, Korea Institute of Science & Technology, Hwarang-ro 14-gil 5, Seongbuk-gu, Seoul 02792, Republic of Korea. E-mail: leekb@kist.re.kr;*

<sup>b</sup> *Advanced Analysis and Data Center, Korea Institute of Science and Technology, Hwarangno 14-gil 5, Seongbuk-gu, Seoul 02792, Republic of Korea*

<sup>c</sup> *Department of Energy and Environment Technology, KIST school, University of Science and Technology, Seoul, 02792, Republic of Korea*

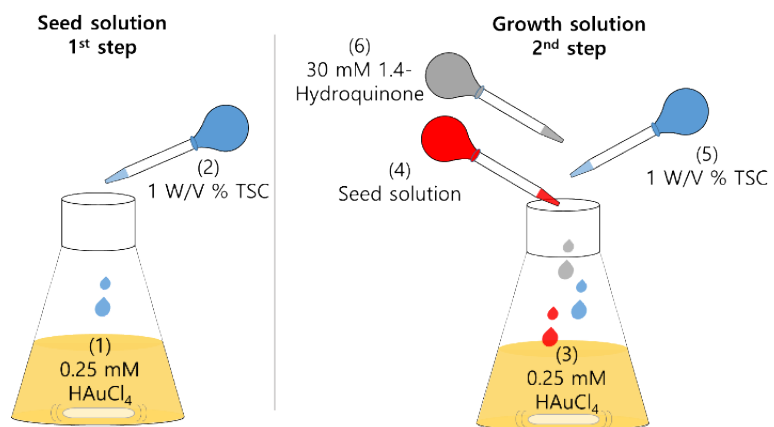

**Fig. S1** Diagram showing the sequential synthesis procedure ((1)→(6)) of the AuNU solution.

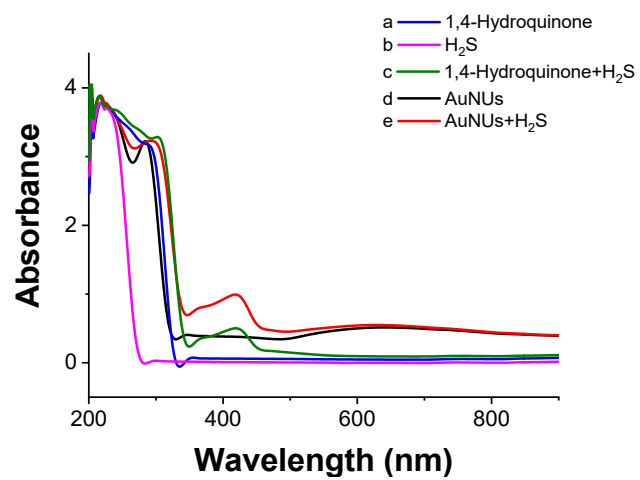

**Fig. S2** UV-Vis absorption spectra of (a) 1,4-hydroquinone, (b) H<sub>2</sub>S, (c) 1,4-hydroquinone + H<sub>2</sub>S, (d) AuNUs, and (e) AuNUs + H<sub>2</sub>S at pH 4.0 and 25 °C in 20 mM NaCl.

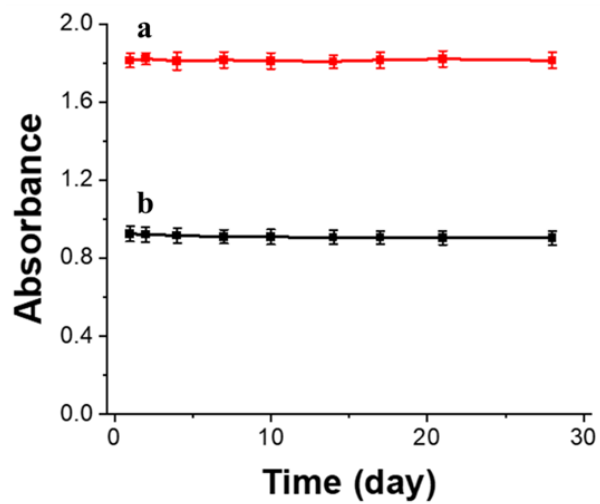

**Fig. S3** Long-term stability plot of (a) the AuNUs+H<sub>2</sub>S absorbance at 421 nm as well as (b) the stability of the AuNUs absorbance at 672 nm for four weeks (at pH 4.0 and 25 °C in 20 mM NaCl).

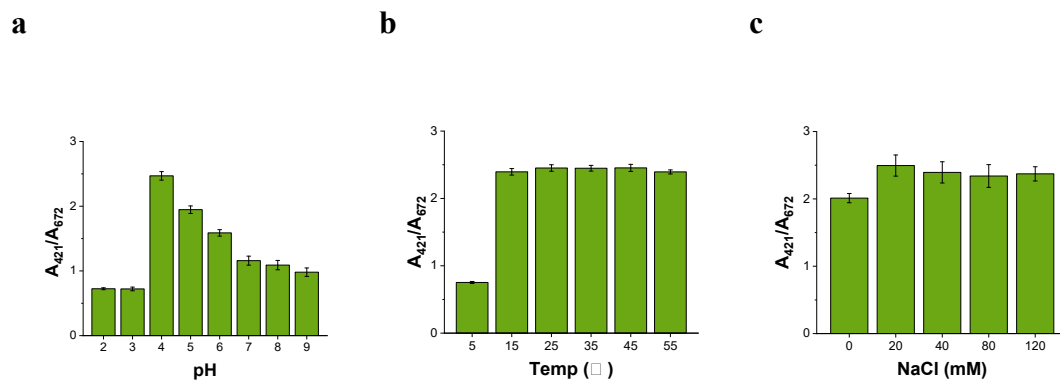

**Fig. S4** Absorption ratios ( $A_{421\text{nm}}/A_{672\text{nm}}$ ) of AuNUs-H<sub>2</sub>S as a function of (a) pH in the presence of 20 mM NaCl at 25 °C, (b) Temperature in the presence of 20 mM NaCl at pH 4.0 and (c) NaCl concentration at pH 4.0 and 25 °C.

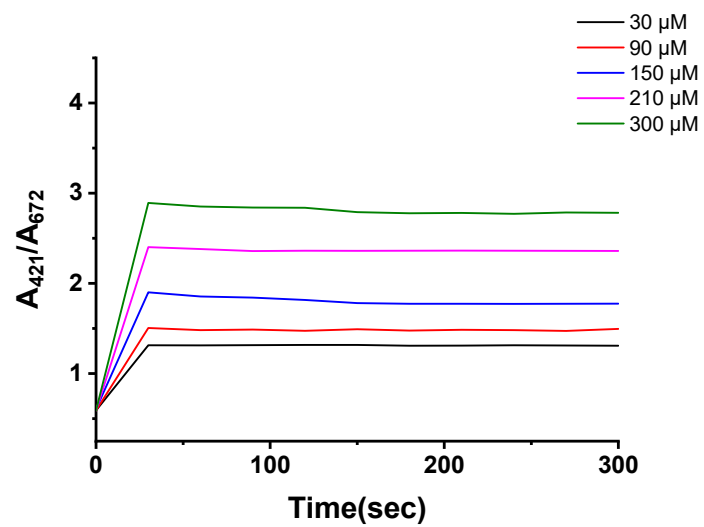

**Fig. S5** Plots of the absorbance ratios ( $A_{421 \text{ nm}}/A_{672 \text{ nm}}$ ) of AuNUs as a function of time (sec) with 30 sec intervals using various concentrations of  $\text{H}_2\text{S}$  at pH 4.0 and 25 °C in 20 mM NaCl.

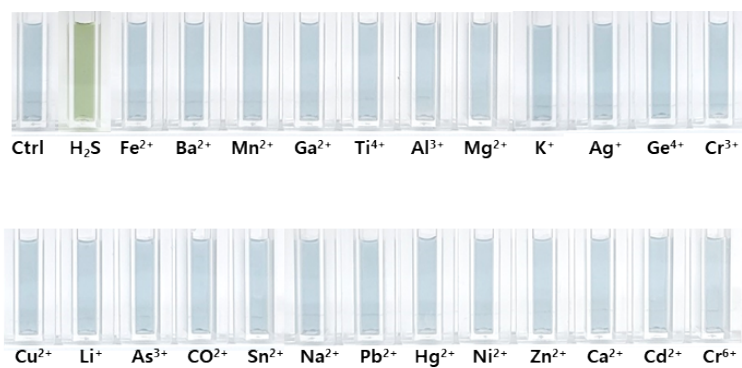

**Fig. S6** Photographs of the AuNU dispersions upon the addition of 0.15 mM H<sub>2</sub>S or 1.5 mM of various metal ions at pH 4.0 and 25 °C in 20 mM NaCl.
